# Supplementary material for: Highly sensitive turn-off fluorescent detection of cyanide in aqueous medium using dicyanovinyl-substituted phenanthridine fluorophore
Source: Royal Society of Chemistry journal article supplement (doi:10.1039/d0ra00623h), 2020-01-01
Supplement: d0ra00623h1.pdf [file d0ra00623h1.pdf]

## Supporting Information

### Highly sensitive turn-off fluorescent detection of cyanide in aqueous medium using dicyanovinyl substituted phenanthridine fluorophore

Saravanakumar Manickam and Sathiyarayanan Kulathu Iyer\*

Department of Chemistry, School of Advanced Sciences and Vellore Institute of Technology,

Vellore-632 014, Tamil Nadu, India. E-mail: sathiya\_kuna@hotmail.com

#### Table of contents

| Sl. No | Title       | Page no |
|--------|-------------|---------|
| 1      | Figures     | S2      |
| 2      | NMR Spectra | S3      |
| 3      | Tables      | S6      |



# SI Figure S2 <sup>1</sup>H and <sup>13</sup>C NMR spectra of compound 5

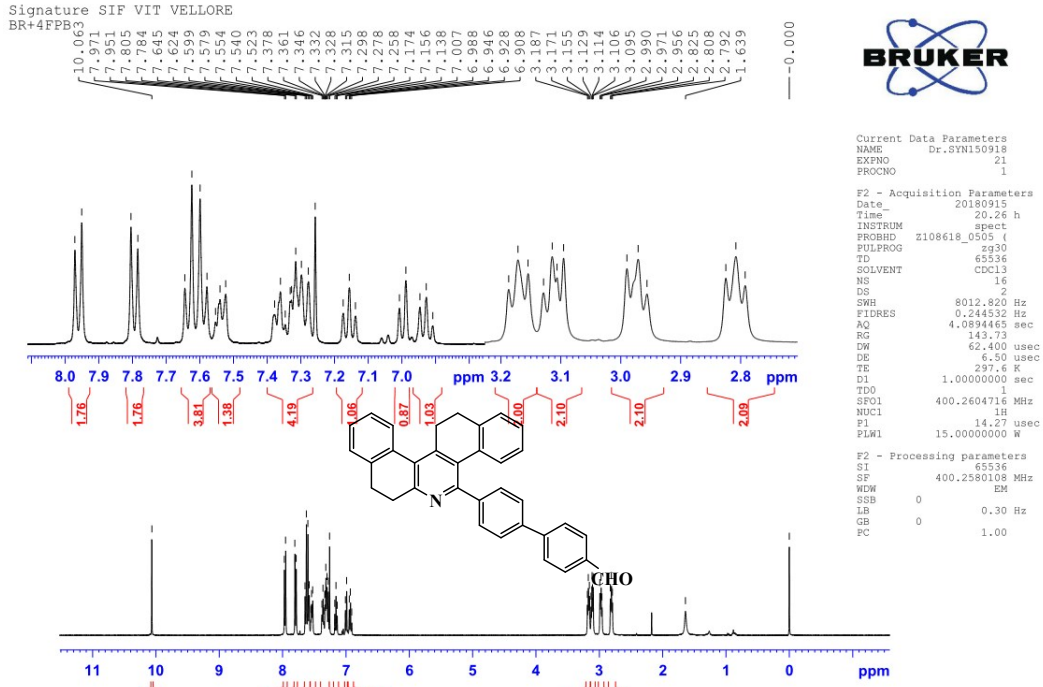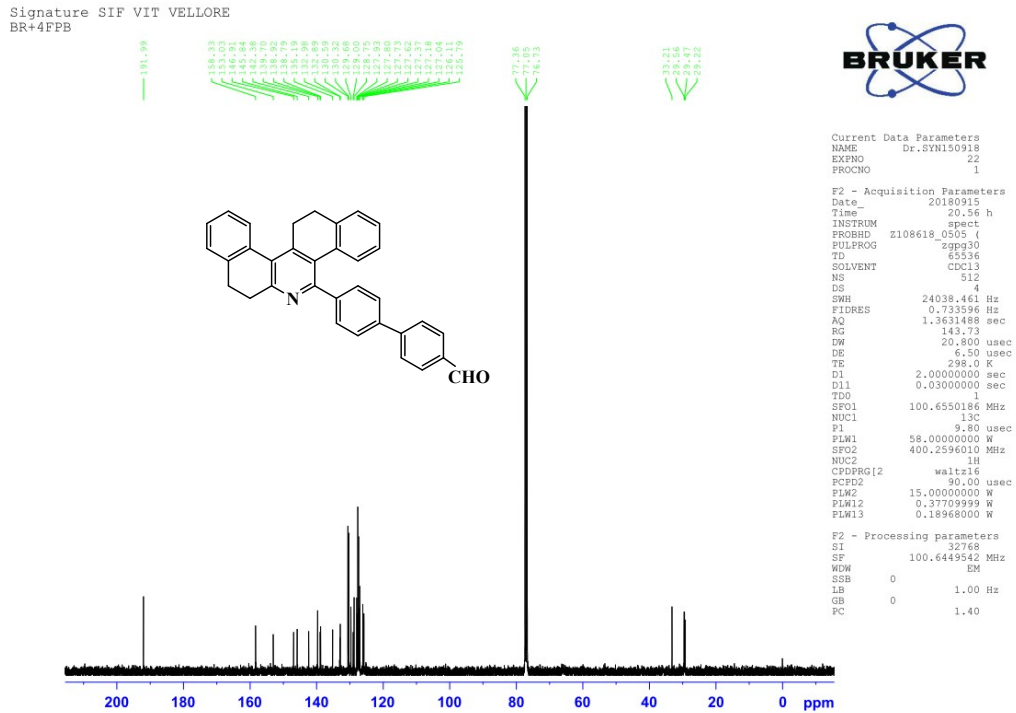





### SI Figure S6 HRMS spectra of compound: 7

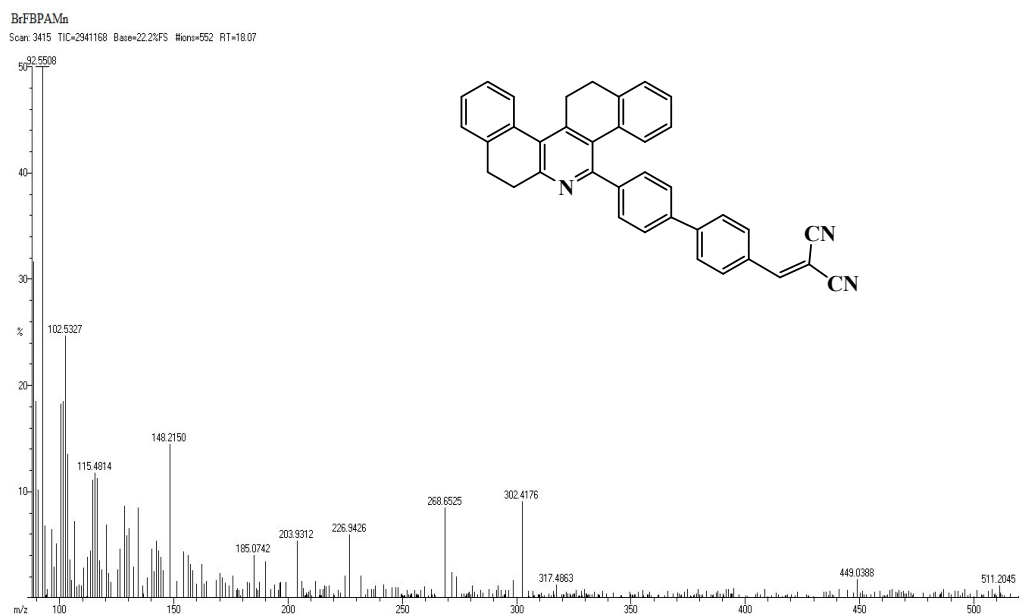

### SI Figure S7 HRMS spectra of compound: 7+CN. Exact mass (M) calculated 537.2085, mass obtained in m/z 537.2083

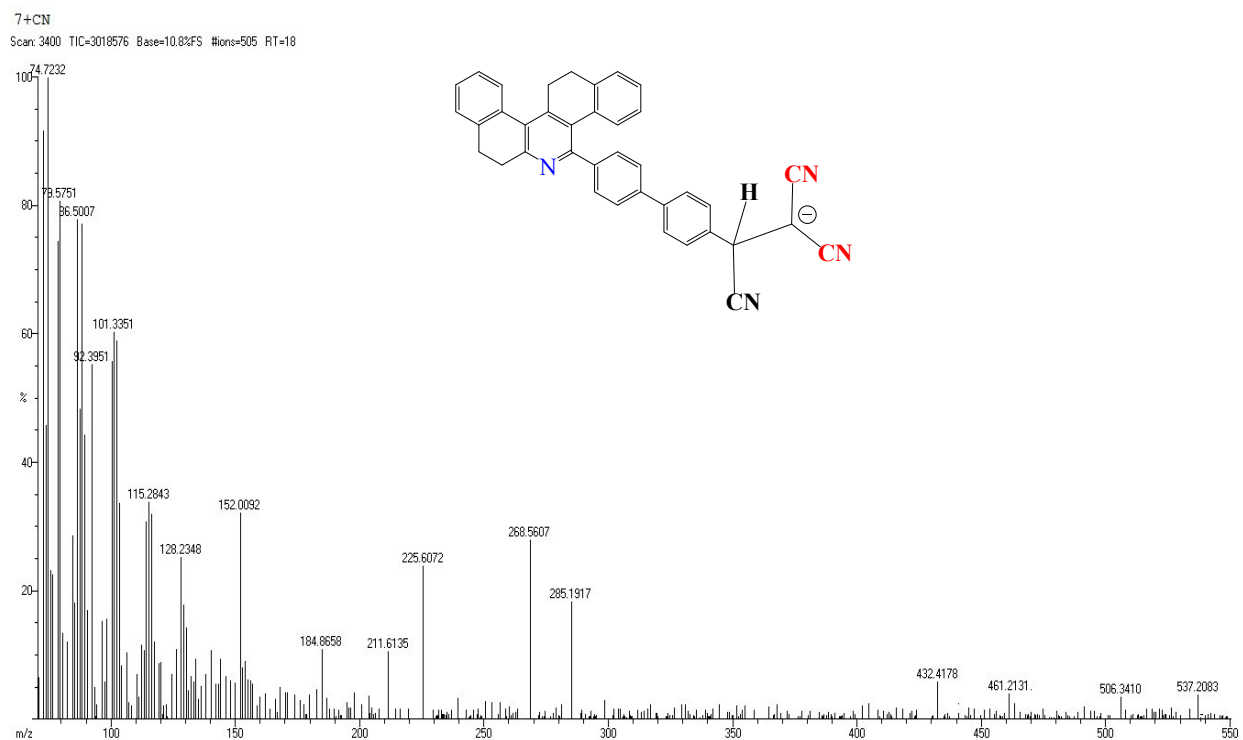

**SI Table S1** The comparisons of Fluorescence “off” cyanide detection sensor LOD of 7 in the previous and present works

| Name of the receptor                                                                           | Solvent/supported systems         | Method used          | Detection limit     | Application                                                                                                               | References                                                                                    |
|------------------------------------------------------------------------------------------------|-----------------------------------|----------------------|---------------------|---------------------------------------------------------------------------------------------------------------------------|-----------------------------------------------------------------------------------------------|
| Calorimetric sensing of cyanide based on dipyrin adducts                                       | Dichloromethane                   | Calorimetric sensing | 3.6, 4.2 and 7.1 μM | -                                                                                                                         | Org. Biomol. Chem., <b>2012</b> , 10, 4201                                                    |
| Carbazole based hemicyanine                                                                    | Acetonitrile                      | Ratiometric sensing  | 0.54 μM             | TLC Plate                                                                                                                 | Dalton Trans., <b>2013</b> , 42, 10682                                                        |
| Cyanide detection in aqueous solution using carbazole                                          | ACN:H <sub>2</sub> O (9:1)        | Fluorescence “off”   | 0.126 μM            | Test paper Strips                                                                                                         | RSC. Adv., <b>2014</b> , 4, 22902                                                             |
| Solvatochromic AIE luminogens as supersensitive and highly efficient CN <sup>-</sup> detection | Aqueous solution                  | Fluorescence “off”   | 0.2 μM              | Test paper Strips                                                                                                         | Chem. Sci., <b>2014</b> , 5, 2710                                                             |
| Cyanide detection based on triphenylimidazole derivatives                                      | Acetonitrile                      | Fluorescence “off”   | 0.1 μM              | -                                                                                                                         | Spectrochimica Acta Part A: Molecular and Biomolecular Spectroscopy <b>2014</b> , 124, 97-101 |
| A new coumarin based fluorogenic cyanide sensing                                               | ACN:H <sub>2</sub> O (1:1)        | Fluorescence “on”    | 0.14 μM             | CN <sup>-</sup> detection visualized on TLC Plate and CN <sup>-</sup> determination in water samples.                     | RSC. Adv., <b>2015</b> , 5, 96905                                                             |
| Cyanide in aqueous media using novel AIEE fluorophores                                         | DMSO                              | Fluorescence “off”   | 0.29 μM             | -                                                                                                                         | RSC. Adv., <b>2015</b> , 5, 12191                                                             |
| 7-azaindole based ratiometric fluorescent sensor                                               | THF:H <sub>2</sub> O (9:1)        | Ratiometric sensing  | 2.1 μM              | Test paper Strips                                                                                                         | Dyes and Pigments, <b>2015</b> , 123, 1-7                                                     |
| Detection of cyanide based on a novel dicyanovinyl phenylacetylene                             | ACN:HEPES buffered solution (9:1) | Fluorescence “on”    | 0.68 μM             | CN <sup>-</sup> determination in water samples                                                                            | New. J. Chem., <b>2017</b> , 41, 4058                                                         |
| Selective recognition of cyanide based on the FRET mechanism                                   | Dimethylformamide                 | Fluorescence “on”    | 63 nM               | Color changes in Silica gel plates                                                                                        | J.Org. Chem. <b>2017</b> , 82, 6259-6267                                                      |
| Detection of cyanide based on a dicyanovinyl pyrazoles                                         | ACN:H <sub>2</sub> O 1%           | Fluorescence “off”   | 6.8 μM              | Test paper Strips                                                                                                         | J.Org. Chem. <b>2017</b> , 82, 13376-13385                                                    |
| Carbazole based cyanide detection                                                              | DMSO                              | Fluorescence “off”   | 67.4 nM             | Test paper Strips                                                                                                         | Dyes and Pigments, <b>2019</b> , 164, 165-173                                                 |
| Pheanthridine based cyanide detection                                                          | Acetonitrile-water (1%)           | Fluorescence “off”   | 39.3 nM             | CN <sup>-</sup> detection visualized on Test paper Strips, Logic gate and CN <sup>-</sup> determination in water samples. | Present work                                                                                  |

**Table S2** UV-Vis spectra characteristic of **7** and **7+CN<sup>-</sup>** by experimental and theoretical

| <b>Compound</b> | <b>Experimental</b>         |            | <b>Theoretical</b> |                            |                       |                               |
|-----------------|-----------------------------|------------|--------------------|----------------------------|-----------------------|-------------------------------|
|                 | $\lambda_{\text{abs}}$ (nm) | $\epsilon$ | <b>Wavelength</b>  | <b>Oscillator strength</b> | <b>State Involved</b> | <b>Key Transitions</b>        |
| 7               | 368                         | 0.51       | 365.63             | 0.4252                     | S3 $\rightarrow$ S0   | HOMO-1 $\rightarrow$ LUMO 89% |
| 7+CN            | 320                         | 0.27       | 332.91             | 0.5462                     | S10 $\rightarrow$ S0  | HOMO-2 $\rightarrow$ LUMO 98% |
